# Supplementary material
Source: bioRxiv or medRxiv preprint supplement (https://www.biorxiv.org/highwire/filestream/33515/field_highwire_adjunct_files/1/084798-2.pdf)
Supplement: Supplementary file [file 084798-2.pdf]

Supplementary Table 3a: Summary of the BMI SNPs previously identified as associated with BMI at genome wide significance.

| SNP        | Chr | Position (bp) | A1 | A2 | Frequency | Beta      | SE     | P        | Nearest Gene |
|------------|-----|---------------|----|----|-----------|-----------|--------|----------|--------------|
| rs1000940  | 17  | 5223976       | G  | A  | 0.225     | 0.0192    | 0.0034 | 1.28E-08 | RABEP1       |
| rs10132280 | 14  | 24998019      | A  | C  | 0.3333    | -2.30E-02 | 0.0034 | 1.14E-11 | STXBP6       |
| rs1016287  | 2   | 59159129      | T  | C  | 0.325     | 2.29E-02  | 0.0034 | 2.25E-11 | LINC01122    |
| rs10182181 | 2   | 25003800      | A  | G  | 0.5       | -0.0307   | 0.0031 | 8.78E-24 | ADCY3        |
| rs10733682 | 9   | 128500735     | A  | G  | 0.425     | 0.0174    | 0.0031 | 1.83E-08 | LMX1B        |
| rs10938397 | 4   | 44877284      | A  | G  | 0.5667    | -0.0402   | 0.0031 | 3.21E-38 | GNPDA2       |
| rs10968576 | 9   | 28404339      | G  | A  | 0.2917    | 2.49E-02  | 0.0033 | 6.61E-14 | LINGO2       |
| rs11030104 | 11  | 27641093      | A  | G  | 0.8       | 4.14E-02  | 0.0038 | 5.56E-28 | BDNF         |
| rs11057405 | 12  | 121347850     | A  | G  | 0.0917    | -3.07E-02 | 0.0055 | 2.02E-08 | CLIP1        |
| rs11126666 | 2   | 26782315      | G  | A  | 0.6917    | -2.07E-02 | 0.0034 | 1.33E-09 | KCNK3        |
| rs11165643 | 1   | 96696685      | C  | T  | 0.425     | -2.18E-02 | 0.0031 | 2.07E-12 | PTBP2        |
| rs11191560 | 10  | 104859028     | T  | C  | 0.9417    | -0.0308   | 0.0053 | 8.45E-09 | NT5C2        |
| rs11583200 | 1   | 50332407      | C  | T  | 0.375     | 1.77E-02  | 0.0031 | 1.48E-08 | ELAVL4       |
| rs1167827  | 7   | 75001105      | A  | G  | 0.4583    | -0.0202   | 0.0033 | 6.33E-10 | HIP1         |
| rs11688816 | 2   | 62906552      | A  | G  | 0.5417    | -0.0172   | 0.0031 | 1.89E-08 | EHBP1        |
| rs11727676 | 4   | 145878514     | C  | T  | 0.075     | -0.0358   | 0.0064 | 2.55E-08 | HHIP         |
| rs11847697 | 14  | 29584863      | T  | C  | 0.0417    | 4.92E-02  | 0.0084 | 3.99E-09 | PRKD1        |
| rs12286929 | 11  | 114527614     | G  | A  | 0.4333    | 0.0217    | 0.0031 | 1.31E-12 | CADM1        |
| rs12401738 | 1   | 78219349      | A  | G  | 0.425     | 2.11E-02  | 0.0033 | 1.15E-10 | FUBP1        |
| rs12429545 | 13  | 53000207      | G  | A  | 0.9       | -0.0334   | 0.0047 | 1.09E-12 | OLFM4        |
| rs12446632 | 16  | 19842890      | A  | G  | 0.1333    | -4.03E-02 | 0.0046 | 1.48E-18 | GPRC5B       |
| rs12566985 | 1   | 74774781      | G  | A  | 0.425     | 0.0242    | 0.0031 | 3.28E-15 | FPGT-TNNI3K  |
| rs12885454 | 14  | 28806589      | C  | A  | 0.6333    | 2.07E-02  | 0.0033 | 1.94E-10 | PRKD1        |
| rs12940622 | 17  | 76230166      | A  | G  | 0.4583    | -1.82E-02 | 0.0031 | 2.49E-09 | RPTOR        |
| rs13021737 | 2   | 622348        | A  | G  | 0.125     | -6.01E-02 | 0.004  | 1.11E-50 | TMEM18       |
| rs13078960 | 3   | 85890280      | T  | G  | 0.8167    | -0.0297   | 0.0039 | 1.74E-14 | CADM2        |
| rs13107325 | 4   | 103407732     | C  | T  | 0.8833    | -4.77E-02 | 0.0068 | 1.83E-12 | SLC39A8      |
| rs13191362 | 6   | 162953340     | A  | G  | 0.8       | 2.77E-02  | 0.0048 | 7.34E-09 | PARK2        |
| rs1516725  | 3   | 187306698     | T  | C  | 0.0917    | -4.51E-02 | 0.0046 | 1.89E-22 | ETV5         |
| rs1528435  | 2   | 181259207     | T  | C  | 0.5833    | 0.0178    | 0.0031 | 1.20E-08 | UBE2E3       |
| rs16851483 | 3   | 142758126     | G  | T  | 0.9083    | -4.83E-02 | 0.0077 | 3.55E-10 | RASA2        |
| rs16951275 | 15  | 65864222      | C  | T  | 0.225     | -3.11E-02 | 0.0037 | 1.91E-17 | MAP2K5       |
| rs17024393 | 1   | 109956211     | C  | T  | 0.04167   | 0.0658    | 0.0088 | 7.03E-14 | GNAT2        |
| rs17094222 | 10  | 102385430     | C  | T  | 0.2083    | 0.0249    | 0.0038 | 5.94E-11 | HIF1AN       |
| rs17405819 | 8   | 76969139      | C  | T  | 0.3667    | -0.0224   | 0.0033 | 2.07E-11 | HNF4G        |
| rs17724992 | 19  | 18315825      | A  | G  | 0.6917    | 0.0194    | 0.0035 | 3.42E-08 | PGPEP1       |
| rs1808579  | 18  | 19358886      | T  | C  | 0.475     | -1.67E-02 | 0.0031 | 4.17E-08 | C18orf8      |
| rs1928295  | 9   | 119418304     | C  | T  | 0.425     | -0.0188   | 0.0031 | 7.91E-10 | TLR4         |
| rs2033732  | 8   | 85242264      | C  | T  | 0.7583    | 0.0192    | 0.0035 | 4.89E-08 | RALYL        |
| rs205262   | 6   | 34671142      | A  | G  | 0.7333    | -2.21E-02 | 0.0035 | 1.75E-10 | C6orf106     |
| rs2112347  | 5   | 75050998      | G  | T  | 0.375     | -0.0261   | 0.0031 | 6.19E-17 | POC5         |
| rs2121279  | 2   | 142759755     | T  | C  | 0.1167    | 0.0245    | 0.0044 | 2.31E-08 | LRP1B        |
| rs2176598  | 11  | 43820854      | T  | C  | 0.2       | 0.0198    | 0.0036 | 2.97E-08 | HSD17B12     |
| rs2207139  | 6   | 50953449      | G  | A  | 0.1       | 4.47E-02  | 0.004  | 4.13E-29 | TFAP2B       |
| rs2245368  | 7   | 76446079      | T  | C  | 0.7583    | -3.17E-02 | 0.0057 | 3.19E-08 | PMS2L11      |
| rs2287019  | 19  | 50894012      | C  | T  | 0.85      | 3.60E-02  | 0.0042 | 4.59E-18 | QPCTL        |
| rs2365389  | 3   | 61211502      | C  | T  | 0.6583    | 2.00E-02  | 0.0031 | 1.63E-10 | FHIT         |
| rs2650492  | 16  | 28240912      | A  | G  | 0.3083    | 2.07E-02  | 0.0035 | 1.92E-09 | SBK1         |
| rs2820292  | 1   | 200050910     | A  | C  | 0.4917    | -0.0195   | 0.0031 | 1.83E-10 | NAV1         |
| rs29941    | 19  | 39001372      | A  | G  | 0.3333    | -1.82E-02 | 0.0033 | 2.41E-08 | KCTD15       |
| rs3101336  | 1   | 72523773      | T  | C  | 0.3509    | -3.34E-02 | 0.0031 | 2.66E-26 | NEGR1        |
| rs3736485  | 15  | 49535902      | A  | G  | 0.425     | 1.76E-02  | 0.0031 | 7.41E-09 | DMXL2        |
| rs3810291  | 19  | 52260843      | A  | G  | 0.625     | 0.0283    | 0.0036 | 4.81E-15 | ZC3H4        |
| rs3817334  | 11  | 47607569      | C  | T  | 0.55      | -0.0262   | 0.0031 | 5.15E-17 | MTCH2        |
| rs3849570  | 3   | 81874802      | A  | C  | 0.3667    | 0.0188    | 0.0034 | 2.60E-08 | GBE1         |
| rs3888190  | 16  | 28796987      | A  | C  | 0.3583    | 3.09E-02  | 0.0031 | 3.14E-23 | ATP2A1       |
| rs4740619  | 9   | 15624326      | T  | C  | 0.5333    | 0.0179    | 0.0031 | 4.56E-09 | C9orf93      |
| rs543874   | 1   | 176156103     | G  | A  | 0.2667    | 4.82E-02  | 0.0039 | 2.62E-35 | SEC16B       |
| rs6477694  | 9   | 110972163     | C  | T  | 0.3583    | 0.0174    | 0.0031 | 2.67E-08 | EPB41L4B     |
| rs6567160  | 18  | 55980115      | C  | T  | 0.2833    | 5.56E-02  | 0.0036 | 3.93E-53 | MC4R         |

|           |    |           |   |   |        |           |        |          |         |
|-----------|----|-----------|---|---|--------|-----------|--------|----------|---------|
| rs657452  | 1  | 49362434  | A | G | 0.4167 | 0.0227    | 0.0031 | 5.48E-13 | AGBL4   |
| rs6804842 | 3  | 25081441  | A | G | 0.425  | -1.85E-02 | 0.0031 | 2.48E-09 | RARB    |
| rs7138803 | 12 | 48533735  | G | A | 0.5583 | -3.15E-02 | 0.0031 | 8.15E-24 | BCDIN3D |
| rs7141420 | 14 | 78969207  | T | C | 0.6167 | 0.0235    | 0.0031 | 1.23E-14 | NRXN3   |
| rs7243357 | 18 | 55034299  | G | T | 0.1333 | -2.17E-02 | 0.004  | 3.86E-08 | GRP     |
| rs758747  | 16 | 3567359   | C | T | 0.7333 | -2.25E-02 | 0.0037 | 7.47E-10 | NLRC3   |
| rs7599312 | 2  | 213121476 | G | A | 0.7083 | 0.022     | 0.0034 | 1.17E-10 | ERBB4   |
| rs7899106 | 10 | 87400884  | A | G | 0.95   | -3.95E-02 | 0.0071 | 2.96E-08 | GRID1   |
| rs7903146 | 10 | 114748339 | T | C | 0.25   | -2.34E-02 | 0.0034 | 1.11E-11 | TCF7L2  |
| rs9400239 | 6  | 109084356 | C | T | 0.7    | 1.88E-02  | 0.0033 | 1.61E-08 | FOXO3   |

Supplementary Table 3b: Summary of the height SNPs previously identified as associated with height at genome wide significance

| SNP        | Chr | Position (bp) | A1 | A2 | Frequency | A1    | Beta      | SE     | P        | Nearest Gene |
|------------|-----|---------------|----|----|-----------|-------|-----------|--------|----------|--------------|
| rs10883563 | 10  | 102674370     | A  | C  |           | 0.543 | 0.023     | 0.0029 | 6.30E-15 | FAM178A      |
| rs7899004  | 10  | 104331425     | T  | C  |           | 0.558 | 0.025     | 0.0029 | 7.00E-17 | SUFU         |
| rs6584575  | 10  | 105567399     | A  | G  |           | 0.08  | 0.034     | 0.0052 | 9.50E-11 | SH3PXD2A     |
| rs291979   | 10  | 121119787     | A  | G  |           | 0.225 | 2.90E-02  | 0.0035 | 2.00E-16 | GRK5         |
| rs1614303  | 10  | 123386796     | T  | G  |           | 0.867 | 2.20E-02  | 0.0038 | 5.70E-09 | FGFR2        |
| rs10794175 | 10  | 126348063     | T  | G  |           | 0.296 | 2.00E-02  | 0.003  | 6.40E-12 | FAM53B       |
| rs12779328 | 10  | 12983979      | T  | C  |           | 0.35  | -2.80E-02 | 0.0033 | 1.70E-17 | CCDC3        |
| rs4350272  | 10  | 25096124      | A  | G  |           | 0.367 | 0.02      | 0.0033 | 2.60E-09 | ARHGAP21     |
| rs7069985  | 10  | 27930837      | A  | G  |           | 0.808 | -2.30E-02 | 0.0034 | 1.60E-11 | RAB18        |
| rs4332428  | 10  | 4955434       | A  | G  |           | 0.881 | 3.60E-02  | 0.0045 | 1.50E-15 | AKR1C1       |
| rs10995319 | 10  | 52432893      | T  | C  |           | 0.733 | 1.90E-02  | 0.0034 | 3.20E-08 | PRKG1        |
| rs1171615  | 10  | 61139096      | T  | C  |           | 0.833 | -0.022    | 0.0038 | 5.80E-09 | SLC16A9      |
| rs10997979 | 10  | 69607198      | A  | G  |           | 0.433 | -0.021    | 0.0029 | 3.80E-13 | MYPN         |
| rs2631676  | 10  | 93027389      | A  | G  |           | 0.725 | -2.80E-02 | 0.0039 | 4.60E-13 | PCGF5        |
| rs10790381 | 11  | 119762705     | A  | G  |           | 0.792 | 0.027     | 0.0038 | 2.00E-12 | ARHGFE12     |
| rs1461503  | 11  | 122350285     | A  | C  |           | 0.45  | -0.018    | 0.0029 | 4.90E-10 | BSX          |
| rs6485978  | 11  | 12634991      | T  | C  |           | 0.545 | -2.30E-02 | 0.0029 | 1.40E-15 | TEAD1        |
| rs2272566  | 11  | 234552        | A  | G  |           | 0.373 | 1.60E-02  | 0.0029 | 2.60E-08 | PSMD13       |
| rs2237886  | 11  | 2767307       | T  | C  |           | 0.108 | 0.043     | 0.0049 | 5.30E-18 | KCNQ1        |
| rs10767838 | 11  | 30304503      | A  | G  |           | 0.767 | 0.025     | 0.0033 | 2.60E-14 | C11orf46     |
| rs3802758  | 11  | 45892611      | A  | G  |           | 0.966 | 3.90E-02  | 0.0066 | 2.20E-09 | PEX16        |
| rs1681630  | 11  | 47925728      | T  | C  |           | 0.242 | 2.90E-02  | 0.0031 | 2.40E-20 | PTPRJ        |
| rs3782089  | 11  | 65093395      | T  | C  |           | 0.025 | -5.30E-02 | 0.0066 | 4.60E-16 | SSSCA1       |
| rs7112925  | 11  | 66582736      | T  | C  |           | 0.358 | -0.024    | 0.003  | 6.40E-15 | RHOD         |
| rs606452   | 11  | 74953826      | A  | C  |           | 0.158 | 0.043     | 0.0043 | 1.90E-23 | SERPINH1     |
| rs2164747  | 12  | 102868966     | A  | G  |           | 0.892 | -0.029    | 0.0049 | 4.70E-09 | HSP90B1      |
| rs2888893  | 12  | 105862761     | T  | C  |           | 0.602 | -0.017    | 0.003  | 8.90E-09 | C12orf23     |
| rs11616067 | 12  | 114877557     | A  | G  |           | 0.75  | 2.10E-02  | 0.0035 | 8.00E-09 | MED13L       |
| rs2856321  | 12  | 11747040      | A  | G  |           | 0.603 | -3.10E-02 | 0.003  | 7.60E-24 | ETV6         |
| rs11835818 | 12  | 120979192     | T  | C  |           | 0.558 | -2.20E-02 | 0.0029 | 2.00E-13 | BCL7A        |
| rs7980687  | 12  | 122388664     | A  | G  |           | 0.183 | 0.039     | 0.0037 | 1.00E-26 | SBNO1        |
| rs10770705 | 12  | 20748734      | A  | C  |           | 0.339 | 3.00E-02  | 0.0031 | 2.30E-21 | SLCO1C1      |
| rs11049611 | 12  | 28491511      | T  | C  |           | 0.342 | -3.80E-02 | 0.0032 | 2.50E-32 | CCDC91       |
| rs11612228 | 12  | 447245        | T  | C  |           | 0.308 | 2.00E-02  | 0.0032 | 6.50E-10 | B4GALNT3     |
| rs10880969 | 12  | 45113290      | T  | C  |           | 0.163 | -2.40E-02 | 0.0033 | 6.20E-13 | SLC38A2      |
| rs2306694  | 12  | 54966903      | A  | G  |           | 0.908 | -4.60E-02 | 0.0057 | 1.50E-15 | CS           |
| rs10877030 | 12  | 56542981      | T  | G  |           | 0.608 | 0.023     | 0.0031 | 4.30E-13 | CTDSP2       |
| rs17122659 | 12  | 58243190      | A  | G  |           | 0.892 | -0.031    | 0.0049 | 5.20E-10 | SLC16A7      |
| rs8756     | 12  | 64646019      | A  | C  |           | 0.534 | -5.90E-02 | 0.0029 | 4.50E-90 | HMG2A        |
| rs10748128 | 12  | 68113925      | T  | G  |           | 0.348 | 0.038     | 0.0034 | 4.40E-29 | FRS2         |
| rs17783015 | 12  | 88755517      | T  | C  |           | 0.208 | -0.023    | 0.004  | 1.50E-08 | ATP2B1       |
| rs3825199  | 12  | 92501085      | A  | G  |           | 0.8   | -5.10E-02 | 0.0035 | 3.90E-49 | SOCS2        |
| rs1199734  | 13  | 20468246      | T  | G  |           | 0.167 | -2.20E-02 | 0.0039 | 1.60E-08 | LATS2        |
| rs11618507 | 13  | 29070751      | T  | G  |           | 0.275 | 2.30E-02  | 0.0036 | 3.40E-10 | SLC7A1       |
| rs12323101 | 13  | 32041406      | A  | G  |           | 0.333 | 2.10E-02  | 0.003  | 1.40E-11 | PDS5B        |
| rs6561319  | 13  | 46010121      | A  | C  |           | 0.633 | 0.021     | 0.0031 | 9.80E-12 | LRCH1        |
| rs3118905  | 13  | 50003335      | A  | G  |           | 0.237 | -0.058    | 0.0033 | 1.10E-69 | DLEU7        |
| rs3818416  | 13  | 77372469      | A  | C  |           | 0.208 | -2.10E-02 | 0.0035 | 1.70E-09 | EDNRB        |
| rs11616380 | 13  | 79603316      | T  | G  |           | 0.275 | 1.90E-02  | 0.0033 | 1.20E-08 | SPRY2        |
| rs7319045  | 13  | 90822575      | A  | G  |           | 0.39  | 0.024     | 0.003  | 8.40E-15 | GPC5         |
| rs8017130  | 14  | 22828996      | A  | G  |           | 0.358 | -2.30E-02 | 0.0034 | 1.00E-11 | HOMEZ        |
| rs1950500  | 14  | 23900690      | T  | C  |           | 0.233 | 3.10E-02  | 0.0032 | 3.20E-22 | NFATC4       |
| rs12435366 | 14  | 34908140      | T  | C  |           | 0.254 | -2.30E-02 | 0.0035 | 4.90E-11 | NFKBIA       |
| rs10131337 | 14  | 36214267      | T  | C  |           | 0.203 | 2.70E-02  | 0.0038 | 2.90E-12 | PAX9         |
| rs8006657  | 14  | 54314899      | A  | G  |           | 0.33  | -0.022    | 0.003  | 6.60E-13 | SAMD4A       |
| rs11624136 | 14  | 58758573      | A  | G  |           | 0.45  | 1.80E-02  | 0.0029 | 1.90E-09 | DAAM1        |
| rs2093210  | 14  | 60027032      | T  | C  |           | 0.596 | -0.039    | 0.0031 | 3.00E-35 | C14orf39     |
| rs2781373  | 14  | 64637968      | A  | G  |           | 0.347 | -0.021    | 0.003  | 3.70E-12 | MAX          |

|            |    |          |   |   |       |           |        |          |           |
|------------|----|----------|---|---|-------|-----------|--------|----------|-----------|
| rs1980850  | 14 | 67716941 | A | G | 0.192 | -3.00E-02 | 0.004  | 3.80E-14 | RAD51L1   |
| rs2058092  | 14 | 73002719 | T | C | 0.61  | 1.70E-02  | 0.003  | 1.20E-08 | NUMB      |
| rs862034   | 14 | 74060499 | A | G | 0.49  | -2.80E-02 | 0.003  | 6.40E-20 | LTBP2     |
| rs7154721  | 14 | 91497101 | T | C | 0.6   | 0.027     | 0.0029 | 4.60E-20 | TRIP11    |
| rs1036477  | 15 | 46702218 | A | G | 0.917 | 3.20E-02  | 0.0048 | 3.70E-11 | FBN1      |
| rs16964211 | 15 | 49317787 | A | G | 0.042 | -5.70E-02 | 0.0071 | 1.20E-15 | CYP19A1   |
| rs7177711  | 15 | 60167263 | A | G | 0.517 | 0.021     | 0.0029 | 5.40E-13 | FAM148A   |
| rs7162825  | 15 | 61226239 | T | C | 0.517 | 0.016     | 0.0029 | 3.60E-08 | LACTB     |
| rs17264185 | 15 | 64784141 | A | G | 0.783 | -2.00E-02 | 0.0033 | 1.10E-09 | SMAD6     |
| rs975210   | 15 | 68151406 | A | G | 0.167 | 3.50E-02  | 0.0041 | 1.40E-17 | TLE3      |
| rs12904334 | 15 | 70629759 | A | G | 0.008 | 8.40E-02  | 0.013  | 3.70E-11 | ARIH1     |
| rs5742915  | 15 | 72123686 | T | C | 0.45  | -0.035    | 0.0031 | 1.50E-29 | PML       |
| rs11855014 | 15 | 83529838 | A | G | 0.246 | -0.022    | 0.0034 | 9.20E-11 | PDE8A     |
| rs2280470  | 15 | 87196630 | A | G | 0.339 | 4.40E-02  | 0.0031 | 2.80E-44 | ACAN      |
| rs7181724  | 15 | 92352611 | A | G | 0.528 | -2.00E-02 | 0.0032 | 1.00E-10 | MCTP2     |
| rs4548838  | 15 | 98578713 | T | C | 0.45  | 3.30E-02  | 0.003  | 8.60E-28 | ADAMTS17  |
| rs1659127  | 16 | 14295806 | A | G | 0.3   | 3.00E-02  | 0.0033 | 2.80E-19 | MKL2      |
| rs2023693  | 16 | 20787541 | A | G | 0.383 | -1.70E-02 | 0.003  | 2.40E-08 | DCUN1D3   |
| rs11642612 | 16 | 29937696 | A | C | 0.559 | -0.016    | 0.003  | 4.20E-08 | FLJ25404  |
| rs4785393  | 16 | 48816984 | A | G | 0.817 | -2.30E-02 | 0.004  | 1.30E-08 | PAPD5     |
| rs8058684  | 16 | 52072619 | A | G | 0.308 | 2.10E-02  | 0.0032 | 1.20E-10 | RBL2      |
| rs217181   | 16 | 70671503 | T | C | 0.2   | 2.40E-02  | 0.0038 | 3.70E-10 | HPR       |
| rs11648796 | 16 | 732191   | A | G | 0.733 | -3.30E-02 | 0.0038 | 1.40E-18 | NARFL     |
| rs11640018 | 16 | 73885809 | T | C | 0.638 | -0.019    | 0.0032 | 2.30E-09 | CFDP1     |
| rs6420435  | 16 | 80741702 | A | C | 0.254 | 2.30E-02  | 0.0037 | 2.50E-10 | MPHOSPH6  |
| rs2326458  | 16 | 83545180 | A | C | 0.833 | -2.20E-02 | 0.0035 | 5.00E-10 | ZDHHC7    |
| rs4843367  | 16 | 84975391 | T | C | 0.325 | -1.90E-02 | 0.0032 | 1.80E-09 | FOXF1     |
| rs8052560  | 16 | 87304743 | A | C | 0.783 | 0.036     | 0.0044 | 3.80E-16 | C16orf84  |
| rs4640244  | 17 | 21224816 | A | G | 0.622 | 2.50E-02  | 0.0034 | 1.50E-13 | KCNJ12    |
| rs3809790  | 17 | 24979666 | T | C | 0.475 | -1.60E-02 | 0.0029 | 4.80E-08 | SSH2      |
| rs3760318  | 17 | 26271841 | A | G | 0.358 | -4.10E-02 | 0.003  | 3.00E-41 | CENTA2    |
| rs2338115  | 17 | 34183104 | T | C | 0.558 | 2.30E-02  | 0.0029 | 1.10E-14 | PIP4K2B   |
| rs584828   | 17 | 35852756 | T | C | 0.433 | -0.025    | 0.003  | 3.50E-17 | IGFBP4    |
| rs9766     | 17 | 38106367 | A | G | 0.553 | 2.10E-02  | 0.0029 | 9.00E-13 | EZH1      |
| rs4986172  | 17 | 40571807 | T | C | 0.325 | -3.40E-02 | 0.0032 | 7.60E-27 | ACBD4     |
| rs318095   | 17 | 44329733 | T | C | 0.517 | 0.024     | 0.0029 | 1.50E-16 | ATP5G1    |
| rs870183   | 17 | 546561   | A | G | 0.475 | -1.70E-02 | 0.0029 | 6.20E-09 | VPS53     |
| rs2079795  | 17 | 56851431 | T | C | 0.3   | 4.50E-02  | 0.0031 | 1.70E-46 | C17orf82  |
| rs3923086  | 17 | 60979950 | A | C | 0.392 | -0.024    | 0.0033 | 4.70E-13 | AXIN2     |
| rs2072268  | 17 | 63814947 | A | G | 0.525 | -2.00E-02 | 0.0031 | 1.10E-10 | ARSG      |
| rs11867479 | 17 | 65601802 | T | C | 0.325 | 0.026     | 0.0032 | 2.20E-16 | KCNJ16    |
| rs10083886 | 17 | 67434950 | T | C | 0.217 | 1.90E-02  | 0.0033 | 6.60E-09 | SOX9      |
| rs2117563  | 17 | 70880580 | A | G | 0.134 | -2.40E-02 | 0.0039 | 1.20E-09 | GRB2      |
| rs9217     | 17 | 7303812  | T | C | 0.608 | -2.80E-02 | 0.003  | 4.60E-20 | ZBTB4     |
| rs1552173  | 17 | 74230437 | T | C | 0.542 | -0.018    | 0.0029 | 7.90E-10 | PSCD1     |
| rs4239020  | 17 | 77769930 | T | C | 0.708 | -0.021    | 0.0031 | 8.80E-12 | CCDC57    |
| rs692964   | 18 | 13084132 | A | G | 0.558 | -1.90E-02 | 0.003  | 1.90E-10 | CEP192    |
| rs14062    | 18 | 17704301 | A | G | 0.342 | -1.80E-02 | 0.0031 | 7.80E-09 | MIB1      |
| rs4369779  | 18 | 18989406 | T | C | 0.258 | -5.60E-02 | 0.0036 | 1.50E-53 | CABLES1   |
| rs888403   | 18 | 2756938  | A | G | 0.633 | -1.90E-02 | 0.0033 | 9.30E-09 | SMCHD1    |
| rs11152213 | 18 | 56003928 | A | C | 0.717 | -2.50E-02 | 0.0035 | 6.90E-13 | MC4R      |
| rs8097893  | 18 | 73112043 | A | G | 0.933 | 4.20E-02  | 0.0068 | 4.60E-10 | GALR1     |
| rs11659752 | 18 | 75323850 | T | G | 0.75  | 0.024     | 0.0034 | 5.90E-13 | NFATC1    |
| rs8102380  | 19 | 10662185 | A | G | 0.633 | -0.02     | 0.0031 | 8.00E-11 | ILF3      |
| rs7259684  | 19 | 12047611 | A | G | 0.888 | -3.50E-02 | 0.0064 | 4.10E-08 | LOC729747 |
| rs8103068  | 19 | 17383869 | T | C | 0.867 | 3.10E-02  | 0.0046 | 1.50E-11 | BST2      |
| rs8103992  | 19 | 19526643 | A | C | 0.22  | 0.029     | 0.0037 | 1.20E-14 | PBX4      |
| rs11880992 | 19 | 2127403  | A | G | 0.375 | 0.033     | 0.003  | 6.90E-28 | DOT1L     |
| rs2074977  | 19 | 3385028  | A | C | 0.638 | -0.029    | 0.0031 | 1.90E-20 | NFIC      |
| rs7253628  | 19 | 35739109 | A | G | 0.833 | -2.40E-02 | 0.0039 | 1.50E-09 | ZNF536    |
| rs4802134  | 19 | 43038525 | A | G | 0.193 | 2.70E-02  | 0.004  | 2.60E-11 | SIPA1L3   |

|            |    |           |   |   |       |           |        |           |          |
|------------|----|-----------|---|---|-------|-----------|--------|-----------|----------|
| rs4803468  | 19 | 46614192  | A | G | 0.398 | 0.03      | 0.0031 | 1.70E-21  | BCKDHA   |
| rs2682587  | 19 | 48774269  | A | C | 0.167 | 2.30E-02  | 0.0038 | 2.00E-09  | XRCC1    |
| rs2123731  | 19 | 4880473   | A | G | 0.693 | 2.30E-02  | 0.0035 | 2.00E-11  | UHRF1    |
| rs891088   | 19 | 7135762   | A | G | 0.728 | -2.90E-02 | 0.0034 | 7.20E-18  | INSR     |
| rs7517682  | 1  | 103292177 | A | G | 0.585 | -0.023    | 0.003  | 3.60E-14  | COL11A1  |
| rs10779751 | 1  | 11206923  | A | G | 0.292 | 0.021     | 0.0032 | 2.00E-10  | FRAP1    |
| rs12120956 | 1  | 113004094 | A | G | 0.172 | -2.50E-02 | 0.0035 | 2.10E-12  | CAPZA1   |
| rs9428104  | 1  | 118657110 | A | G | 0.314 | -4.30E-02 | 0.0034 | 2.80E-36  | SPAG17   |
| rs6658763  | 1  | 145158997 | T | C | 0.125 | -0.036    | 0.0054 | 3.60E-11  | FMO5     |
| rs2298265  | 1  | 149525667 | T | C | 0.117 | -0.03     | 0.0046 | 8.30E-11  | ZNF687   |
| rs6688100  | 1  | 158666210 | T | C | 0.466 | 1.60E-02  | 0.0029 | 2.30E-08  | VANGL2   |
| rs4656220  | 1  | 168915901 | T | C | 0.466 | 2.10E-02  | 0.0032 | 1.50E-10  | PRRX1    |
| rs6694089  | 1  | 170350504 | A | G | 0.217 | 0.039     | 0.0032 | 4.20E-33  | DNM3     |
| rs1325596  | 1  | 175060689 | A | G | 0.508 | 0.025     | 0.0029 | 9.70E-18  | PAPPA2   |
| rs3814333  | 1  | 182273742 | T | C | 0.342 | 4.90E-02  | 0.0032 | 4.80E-51  | GLT25D2  |
| rs12137162 | 1  | 19635983  | A | C | 0.271 | 0.019     | 0.0032 | 4.10E-09  | CAPZB    |
| rs425277   | 1  | 2059032   | T | C | 0.28  | 2.80E-02  | 0.0033 | 1.20E-17  | PRKCZ    |
| rs10863936 | 1  | 210304421 | A | G | 0.55  | -2.00E-02 | 0.0029 | 1.10E-11  | DTL      |
| rs6540834  | 1  | 212694042 | T | C | 0.384 | -2.70E-02 | 0.0033 | 2.60E-16  | PTPN14   |
| rs212524   | 1  | 21455898  | T | C | 0.433 | -0.021    | 0.003  | 5.40E-12  | ECE1     |
| rs991967   | 1  | 216682074 | A | C | 0.81  | -0.034    | 0.0032 | 1.80E-26  | TGFB2    |
| rs6696239  | 1  | 225816691 | A | G | 0.233 | -3.80E-02 | 0.0037 | 7.10E-24  | ZNF678   |
| rs2806561  | 1  | 23377382  | A | G | 0.567 | 2.70E-02  | 0.0029 | 1.90E-20  | LUZP1    |
| rs11799609 | 1  | 241684940 | T | G | 0.142 | 2.60E-02  | 0.0042 | 1.10E-09  | SDCCAG8  |
| rs4601530  | 1  | 24916698  | T | C | 0.25  | -2.50E-02 | 0.0033 | 2.70E-14  | CLIC4    |
| rs16834765 | 1  | 32144029  | T | C | 0.058 | 0.045     | 0.0064 | 1.50E-12  | PTP4A2   |
| rs7544462  | 1  | 37735343  | A | C | 0.925 | 3.20E-02  | 0.0053 | 1.50E-09  | C1orf149 |
| rs6600365  | 1  | 41328840  | T | C | 0.6   | -2.70E-02 | 0.0029 | 1.70E-20  | SCMH1    |
| rs3014219  | 1  | 45797041  | A | G | 0.4   | -2.10E-02 | 0.0029 | 9.90E-13  | AKR1A1   |
| rs12855    | 1  | 51212681  | T | C | 0.108 | 0.038     | 0.0051 | 7.30E-14  | CDKN2C   |
| rs6691924  | 1  | 54726833  | T | C | 0.85  | 3.20E-02  | 0.005  | 2.40E-10  | ACOT11   |
| rs2815379  | 1  | 67283062  | A | G | 0.242 | -1.80E-02 | 0.0033 | 1.60E-08  | SLC35D1  |
| rs17391694 | 1  | 78396214  | T | C | 0.136 | 4.30E-02  | 0.0053 | 3.90E-16  | GIPC2    |
| rs9434723  | 1  | 9214869   | A | G | 0.117 | 0.029     | 0.0041 | 9.10E-13  | H6PD     |
| rs2811594  | 1  | 93115870  | A | G | 0.333 | -2.40E-02 | 0.0032 | 4.10E-14  | FAM69A   |
| rs17113369 | 1  | 95559811  | T | C | 0.992 | 7.30E-02  | 0.013  | 5.90E-09  | RWDD3    |
| rs6080830  | 20 | 17719113  | A | G | 0.575 | 1.60E-02  | 0.0029 | 4.20E-08  | BANF2    |
| rs143384   | 20 | 33489170  | A | G | 0.6   | -0.075    | 0.0032 | 1.10E-121 | GDF5     |
| rs4812586  | 20 | 34978087  | A | G | 0.788 | 3.00E-02  | 0.004  | 8.60E-14  | SAMHD1   |
| rs2224538  | 20 | 37985492  | T | C | 0.644 | 0.017     | 0.0031 | 1.90E-08  | MAFB     |
| rs7273787  | 20 | 4046567   | A | G | 0.667 | -2.20E-02 | 0.0031 | 2.80E-12  | SMOX     |
| rs1326023  | 20 | 54275785  | A | G | 0.325 | 2.40E-02  | 0.0032 | 1.10E-13  | MC3R     |
| rs2057291  | 20 | 56905438  | A | G | 0.35  | 0.02      | 0.0032 | 2.20E-10  | GNAS     |
| rs6061231  | 20 | 60390312  | A | C | 0.217 | -2.10E-02 | 0.0032 | 1.00E-10  | RPS21    |
| rs1884897  | 20 | 6560832   | A | G | 0.375 | 4.40E-02  | 0.003  | 1.30E-48  | BMP2     |
| rs2829941  | 21 | 26130806  | T | G | 0.608 | 1.70E-02  | 0.003  | 3.30E-08  | APP      |
| rs2211866  | 21 | 38609977  | A | G | 0.458 | 2.20E-02  | 0.003  | 3.50E-13  | KCNJ15   |
| rs9977276  | 21 | 46260755  | T | G | 0.25  | -2.20E-02 | 0.0035 | 2.90E-10  | COL6A1   |
| rs7284476  | 22 | 36459278  | A | G | 0.474 | 1.80E-02  | 0.003  | 6.10E-09  | TRIOBP   |
| rs738288   | 22 | 38237607  | A | G | 0.442 | -2.00E-02 | 0.003  | 5.50E-11  | SMCR7L   |
| rs3885668  | 2  | 10095930  | T | C | 0.558 | -0.022    | 0.003  | 8.40E-13  | KLF11    |
| rs13388725 | 2  | 108413622 | A | G | 0.617 | -1.80E-02 | 0.003  | 2.00E-09  | GCC2     |
| rs2166898  | 2  | 121329129 | A | G | 0.169 | -0.027    | 0.0041 | 8.60E-11  | GLI2     |
| rs7567288  | 2  | 134151294 | T | C | 0.81  | -2.90E-02 | 0.0038 | 3.00E-14  | NAP5     |
| rs749234   | 2  | 144947819 | A | G | 0.317 | 1.70E-02  | 0.0031 | 2.30E-08  | ZEB2     |
| rs17038954 | 2  | 1624680   | T | C | 0.042 | 4.40E-02  | 0.0062 | 1.30E-12  | PXDN     |
| rs540652   | 2  | 169415674 | T | C | 0.492 | 2.10E-02  | 0.0029 | 3.00E-12  | NOSTRIN  |
| rs12987566 | 2  | 171860892 | T | C | 0.225 | 2.40E-02  | 0.0033 | 1.20E-12  | METTTL8  |
| rs6746356  | 2  | 174524144 | A | C | 0.7   | 0.019     | 0.0034 | 1.20E-08  | SP3      |
| rs833152   | 2  | 182927346 | A | C | 0.483 | -1.70E-02 | 0.003  | 2.10E-08  | PDE1A    |
| rs2345835  | 2  | 18438433  | T | C | 0.483 | -1.80E-02 | 0.003  | 2.20E-09  | RDH14    |

|            |   |           |   |   |       |           |        |           |            |
|------------|---|-----------|---|---|-------|-----------|--------|-----------|------------|
| rs12693589 | 2 | 191540907 | T | C | 0.754 | -2.20E-02 | 0.0034 | 9.10E-11  | STAT1      |
| rs6435143  | 2 | 202902501 | A | C | 0.442 | 1.90E-02  | 0.003  | 1.50E-10  | NOP5/NOP58 |
| rs12470505 | 2 | 219616613 | T | G | 0.842 | 0.048     | 0.0049 | 6.20E-22  | CCDC108    |
| rs6761041  | 2 | 224738373 | T | C | 0.556 | 2.30E-02  | 0.0029 | 3.00E-15  | SERPINE2   |
| rs3116168  | 2 | 232698075 | T | C | 0.325 | -3.90E-02 | 0.0033 | 1.40E-31  | DIS3L2     |
| rs2289195  | 2 | 25316987  | A | G | 0.367 | 3.80E-02  | 0.003  | 2.40E-37  | DNMT3A     |
| rs780094   | 2 | 27594741  | T | C | 0.383 | -0.021    | 0.003  | 5.70E-12  | GCKR       |
| rs6714546  | 2 | 33214929  | A | G | 0.274 | -3.00E-02 | 0.0034 | 1.60E-18  | LTBP1      |
| rs13416119 | 2 | 42316434  | A | G | 0.925 | 0.029     | 0.005  | 1.50E-08  | EML4       |
| rs9309101  | 2 | 43483116  | A | G | 0.653 | -2.10E-02 | 0.0031 | 6.10E-11  | THADA      |
| rs897080   | 2 | 44627706  | T | C | 0.746 | -0.028    | 0.0034 | 1.60E-16  | C2orf34    |
| rs12474201 | 2 | 46774789  | A | G | 0.317 | 2.80E-02  | 0.0031 | 2.30E-19  | SOCS5      |
| rs354196   | 2 | 54819911  | A | G | 0.449 | -2.10E-02 | 0.003  | 5.60E-12  | SPTBN1     |
| rs3791679  | 2 | 55950396  | A | G | 0.72  | 6.00E-02  | 0.0035 | 2.40E-67  | EFEMP1     |
| rs2120335  | 2 | 68348506  | A | G | 0.342 | -1.90E-02 | 0.003  | 8.40E-10  | PPP3R1     |
| rs7568069  | 2 | 71437993  | A | G | 0.667 | -2.20E-02 | 0.0029 | 2.60E-13  | ZNF638     |
| rs11684404 | 2 | 88705737  | T | C | 0.7   | -0.032    | 0.0031 | 9.00E-25  | EIF2AK3    |
| rs6439168  | 3 | 130533633 | A | G | 0.183 | -0.037    | 0.0036 | 7.70E-25  | H1FX       |
| rs2597513  | 3 | 13530836  | T | C | 0.875 | -3.90E-02 | 0.0048 | 3.10E-16  | HDAC11     |
| rs9880211  | 3 | 137590239 | A | G | 0.142 | -0.03     | 0.0034 | 1.60E-18  | STAG1      |
| rs724016   | 3 | 142588260 | A | G | 0.517 | -7.80E-02 | 0.0029 | 3.20E-158 | ZBTB38     |
| rs936339   | 3 | 144018195 | T | C | 0.175 | 0.022     | 0.0039 | 1.80E-08  | PCOLCE2    |
| rs6441170  | 3 | 159289654 | T | C | 0.638 | -2.20E-02 | 0.003  | 9.70E-13  | SHOX2      |
| rs9858528  | 3 | 184838099 | A | G | 0.758 | 2.20E-02  | 0.0033 | 3.50E-11  | KLHL24     |
| rs720390   | 3 | 187031377 | A | G | 0.383 | 3.50E-02  | 0.0031 | 1.20E-29  | IGF2BP2    |
| rs4686904  | 3 | 188921216 | T | C | 0.642 | -2.10E-02 | 0.0031 | 2.50E-11  | BCL6       |
| rs9841435  | 3 | 192593854 | A | G | 0.617 | -2.00E-02 | 0.0031 | 2.40E-10  | CCDC50     |
| rs3915129  | 3 | 41218746  | T | G | 0.483 | -1.60E-02 | 0.0029 | 4.00E-08  | CTNNB1     |
| rs2633761  | 3 | 4703104   | A | G | 0.583 | 1.60E-02  | 0.0029 | 2.60E-08  | ITPR1      |
| rs13088462 | 3 | 51046753  | T | C | 0.942 | -5.90E-02 | 0.0068 | 7.90E-18  | DOCK3      |
| rs2581830  | 3 | 53109138  | T | C | 0.358 | 3.10E-02  | 0.003  | 4.40E-25  | RFT1       |
| rs2034172  | 3 | 55386803  | A | G | 0.383 | -1.80E-02 | 0.0033 | 4.10E-08  | WNT5A      |
| rs1658351  | 3 | 57988613  | T | C | 0.678 | -2.30E-02 | 0.0031 | 9.90E-13  | FLNB       |
| rs6794009  | 3 | 61488535  | A | G | 0.508 | -0.016    | 0.0029 | 3.90E-08  | PTPRG      |
| rs17806888 | 3 | 67499012  | T | C | 0.908 | 0.034     | 0.0048 | 2.90E-12  | SUCLG2     |
| rs2175513  | 3 | 68705056  | A | G | 0.576 | -0.017    | 0.003  | 3.00E-08  | FAM19A1    |
| rs12330322 | 3 | 72538045  | T | C | 0.225 | -3.40E-02 | 0.0035 | 3.30E-22  | RYBP       |
| rs12639764 | 4 | 106435654 | T | C | 0.543 | 2.70E-02  | 0.003  | 1.60E-19  | TET2       |
| rs1562975  | 4 | 109628057 | A | G | 0.297 | 2.50E-02  | 0.0032 | 5.50E-15  | RPL34      |
| rs7659107  | 4 | 114961698 | A | G | 0.742 | -2.40E-02 | 0.0035 | 9.10E-12  | CAMK2D     |
| rs6838153  | 4 | 122940449 | A | G | 0.667 | -2.20E-02 | 0.0031 | 2.60E-12  | EXOSC9     |
| rs12513181 | 4 | 124055106 | A | C | 0.728 | -0.02     | 0.0033 | 3.20E-09  | NUDT6      |
| rs763318   | 4 | 12572672  | A | G | 0.576 | -2.10E-02 | 0.0029 | 8.00E-13  | RAB28      |
| rs1812175  | 4 | 145794294 | A | G | 0.192 | -7.90E-02 | 0.004  | 2.10E-86  | HHIP       |
| rs13150868 | 4 | 152400121 | T | G | 0.527 | 1.70E-02  | 0.003  | 2.20E-08  | ESSPL      |
| rs3958122  | 4 | 1663729   | T | C | 0.449 | 2.70E-02  | 0.0031 | 2.60E-18  | SLBP       |
| rs955748   | 4 | 184452669 | A | G | 0.319 | -2.80E-02 | 0.0034 | 3.10E-16  | WWC2       |
| rs2306596  | 4 | 39020335  | A | C | 0.492 | 1.90E-02  | 0.003  | 7.80E-11  | RFC1       |
| rs1996422  | 4 | 48382108  | A | G | 0.717 | -0.022    | 0.0033 | 2.80E-11  | FRYL       |
| rs6446315  | 4 | 5086488   | A | G | 0.867 | -2.80E-02 | 0.0043 | 4.20E-11  | CYTL1      |
| rs13113518 | 4 | 56094405  | T | C | 0.625 | -1.80E-02 | 0.003  | 8.10E-09  | CLOCK      |
| rs17081935 | 4 | 57518233  | T | C | 0.169 | 3.10E-02  | 0.0037 | 6.70E-17  | C4orf14    |
| rs9993613  | 4 | 73694878  | T | G | 0.509 | 0.03      | 0.0029 | 4.50E-24  | ADAMTS3    |
| rs17556750 | 4 | 82374592  | A | C | 0.275 | 0.046     | 0.0032 | 8.30E-48  | PRKG2      |
| rs2302580  | 4 | 8659534   | T | C | 0.491 | -2.90E-02 | 0.0036 | 4.20E-15  | CPZ        |
| rs13177718 | 5 | 108141243 | T | C | 0.071 | -4.30E-02 | 0.0059 | 2.90E-13  | FER        |
| rs1582931  | 5 | 122685098 | A | G | 0.458 | -2.80E-02 | 0.003  | 2.60E-20  | CCDC100    |
| rs26024    | 5 | 127723921 | A | C | 0.617 | -2.30E-02 | 0.0031 | 3.20E-14  | FBN2       |
| rs7701414  | 5 | 131613857 | A | G | 0.517 | -3.70E-02 | 0.003  | 1.30E-34  | PDLIM4     |
| rs526896   | 5 | 134384604 | T | G | 0.683 | 3.60E-02  | 0.0034 | 2.30E-25  | PITX1      |
| rs165189   | 5 | 139125931 | A | G | 0.88  | -2.90E-02 | 0.0046 | 1.60E-10  | PSD2       |

|            |   |           |   |   |       |           |        |          |           |
|------------|---|-----------|---|---|-------|-----------|--------|----------|-----------|
| rs4624820  | 5 | 141661972 | A | G | 0.4   | 1.80E-02  | 0.0029 | 1.00E-09 | SPRY4     |
| rs2974438  | 5 | 168183481 | A | G | 0.183 | -0.037    | 0.0036 | 4.00E-24 | SLIT3     |
| rs4868126  | 5 | 171216074 | T | G | 0.35  | -0.036    | 0.0032 | 2.80E-29 | FBXW11    |
| rs7733195  | 5 | 172927230 | A | G | 0.375 | -2.90E-02 | 0.003  | 2.70E-21 | FAM44B    |
| rs422421   | 5 | 176449932 | T | C | 0.22  | -0.034    | 0.0036 | 1.80E-20 | FGFR4     |
| rs11750568 | 5 | 178468319 | A | G | 0.433 | 2.00E-02  | 0.0031 | 6.20E-11 | ADAMTS2   |
| rs6879260  | 5 | 179663620 | T | C | 0.342 | -2.70E-02 | 0.0031 | 1.90E-18 | GFPT2     |
| rs17410035 | 5 | 31576899  | T | G | 0.264 | 1.90E-02  | 0.0031 | 9.00E-10 | C5orf22   |
| rs9292468  | 5 | 32854830  | T | C | 0.475 | 0.036     | 0.003  | 1.50E-33 | C5orf23   |
| rs301901   | 5 | 37082383  | A | G | 0.633 | 0.024     | 0.0029 | 4.30E-16 | NIPBL     |
| rs3812040  | 5 | 39461777  | T | C | 0.714 | 2.40E-02  | 0.0033 | 2.40E-13 | DAB2      |
| rs17574650 | 5 | 42472673  | A | C | 0.908 | -0.038    | 0.0054 | 2.10E-12 | GHR       |
| rs7716219  | 5 | 54990828  | T | C | 0.292 | 3.00E-02  | 0.0031 | 7.20E-22 | SLC38A9   |
| rs2662027  | 5 | 56290242  | T | G | 0.083 | -3.30E-02 | 0.0048 | 6.30E-12 | MIER3     |
| rs7727731  | 5 | 64710202  | T | C | 0.083 | 3.30E-02  | 0.0049 | 1.30E-11 | ADAMTS6   |
| rs9291926  | 5 | 67635412  | T | G | 0.483 | 0.019     | 0.0031 | 3.40E-10 | PIK3R1    |
| rs34651    | 5 | 72179761  | T | C | 0.905 | -4.10E-02 | 0.0058 | 2.20E-12 | TNPO1     |
| rs820848   | 5 | 74000416  | A | G | 0.708 | -2.10E-02 | 0.0035 | 3.30E-09 | HEXB      |
| rs12519505 | 5 | 77541632  | T | C | 0.192 | -0.022    | 0.0036 | 8.50E-10 | AP3B1     |
| rs32855    | 5 | 79871948  | A | G | 0.783 | 2.40E-02  | 0.0036 | 5.80E-11 | FAM151B   |
| rs6894139  | 5 | 88363538  | T | G | 0.534 | 3.00E-02  | 0.003  | 6.10E-24 | MEF2C     |
| rs314263   | 6 | 105499438 | T | C | 0.627 | -4.30E-02 | 0.0031 | 1.00E-42 | LIN28B    |
| rs6920372  | 6 | 109830632 | A | G | 0.364 | -2.50E-02 | 0.0029 | 1.70E-17 | PPIL6     |
| rs2145357  | 6 | 116558135 | A | G | 0.708 | -2.10E-02 | 0.0033 | 3.90E-10 | NT5DC1    |
| rs1405212  | 6 | 117597357 | T | C | 0.355 | -2.30E-02 | 0.003  | 1.80E-14 | VGLL2     |
| rs1155939  | 6 | 126907826 | A | C | 0.433 | 4.20E-02  | 0.0029 | 9.60E-46 | C6orf173  |
| rs4896582  | 6 | 142745570 | A | G | 0.267 | -5.10E-02 | 0.0032 | 2.60E-55 | GPR126    |
| rs6902771  | 6 | 152199574 | T | C | 0.417 | 0.031     | 0.003  | 7.20E-25 | ESR1      |
| rs11156098 | 6 | 156629523 | T | C | 0.043 | 2.70E-02  | 0.0047 | 1.80E-08 | ARID1B    |
| rs1832871  | 6 | 158642022 | A | G | 0.367 | 2.50E-02  | 0.0031 | 1.80E-15 | TULP4     |
| rs991946   | 6 | 166249852 | T | C | 0.5   | -0.021    | 0.0029 | 8.40E-13 | T         |
| rs2763273  | 6 | 168577472 | T | C | 0.241 | -2.20E-02 | 0.0034 | 2.80E-10 | SMOC2     |
| rs17330192 | 6 | 17697354  | T | C | 0.8   | -1.90E-02 | 0.0033 | 1.80E-08 | FAM8A1    |
| rs1047014  | 6 | 19949472  | T | C | 0.725 | -3.20E-02 | 0.0036 | 1.30E-18 | ID4       |
| rs932445   | 6 | 2112224   | T | C | 0.575 | 0.018     | 0.003  | 6.00E-09 | GMDS      |
| rs806794   | 6 | 26308656  | A | G | 0.724 | 0.06      | 0.0033 | 4.60E-74 | HIST1H2BF |
| rs1233627  | 6 | 28859706  | T | C | 0.5   | 2.40E-02  | 0.0029 | 3.10E-16 | TRIM27    |
| rs9404952  | 6 | 29912144  | A | G | 0.483 | 0.018     | 0.003  | 2.50E-09 | HLA-G     |
| rs6457374  | 6 | 31380240  | T | C | 0.608 | -4.10E-02 | 0.0034 | 8.30E-35 | HLA-C     |
| rs12214804 | 6 | 34296844  | T | C | 0.925 | -8.40E-02 | 0.0057 | 1.50E-49 | HMGA1     |
| rs16895130 | 6 | 42032909  | A | G | 0.636 | -0.023    | 0.0033 | 4.30E-12 | CCND3     |
| rs10948222 | 6 | 45352393  | T | C | 0.387 | -3.10E-02 | 0.0033 | 9.80E-21 | SUPT3H    |
| rs9395264  | 6 | 47582981  | T | G | 0.342 | -2.00E-02 | 0.0031 | 2.00E-10 | CD2AP     |
| rs12209223 | 6 | 76221309  | A | C | 0.129 | 5.10E-02  | 0.0049 | 4.90E-25 | FILIP1    |
| rs9392918  | 6 | 7653630   | T | C | 0.5   | -0.038    | 0.0029 | 3.80E-38 | BMP6      |
| rs310421   | 6 | 81848782  | T | G | 0.483 | 3.20E-02  | 0.0029 | 3.30E-27 | FAM46A    |
| rs761391   | 6 | 85504822  | T | C | 0.569 | -0.019    | 0.0034 | 8.30E-09 | TBX18     |
| rs6952113  | 7 | 120564855 | A | G | 0.375 | -1.80E-02 | 0.003  | 1.20E-09 | C7orf58   |
| rs929637   | 7 | 12243047  | T | G | 0.207 | -2.10E-02 | 0.0035 | 2.00E-09 | TMEM106B  |
| rs6962887  | 7 | 134696326 | T | G | 0.655 | 2.30E-02  | 0.0034 | 6.10E-11 | CNOT4     |
| rs273945   | 7 | 137262106 | A | C | 0.466 | -1.90E-02 | 0.0031 | 1.40E-09 | CREB3L2   |
| rs822531   | 7 | 148260692 | T | C | 0.764 | 3.60E-02  | 0.004  | 1.70E-18 | EZH2      |
| rs6955948  | 7 | 150139653 | T | C | 0.263 | 0.031     | 0.0034 | 5.20E-20 | TMEM176A  |
| rs3807931  | 7 | 20348199  | A | G | 0.408 | 2.70E-02  | 0.0029 | 1.20E-19 | ITGB8     |
| rs12538407 | 7 | 23487841  | A | G | 0.617 | 0.032     | 0.003  | 3.50E-26 | IGF2BP3   |
| rs1055144  | 7 | 25837634  | T | C | 0.183 | 0.021     | 0.0037 | 7.80E-09 | NFE2L3    |
| rs798497   | 7 | 2762483   | A | G | 0.712 | 5.70E-02  | 0.0032 | 2.20E-71 | GNA12     |
| rs552707   | 7 | 28171828  | T | C | 0.314 | 4.60E-02  | 0.0032 | 9.30E-46 | JAZF1     |
| rs6462432  | 7 | 32902049  | A | G | 0.298 | 0.017     | 0.003  | 2.60E-08 | KBTBD2    |
| rs2715094  | 7 | 50697946  | A | G | 0.75  | -0.021    | 0.0034 | 9.20E-10 | GRB10     |
| rs1113765  | 7 | 55856828  | A | G | 0.192 | -2.40E-02 | 0.0038 | 1.70E-10 | 41883     |

|            |   |           |   |   |       |           |        |          |            |
|------------|---|-----------|---|---|-------|-----------|--------|----------|------------|
| rs12669267 | 7 | 72942572  | T | C | 0.135 | -2.90E-02 | 0.0052 | 3.00E-08 | WBSCR28    |
| rs17807185 | 7 | 77146231  | A | G | 0.592 | -2.20E-02 | 0.003  | 3.90E-13 | RSBN1L     |
| rs4725061  | 7 | 8053164   | A | G | 0.578 | -0.02     | 0.0031 | 1.10E-10 | GLCC1      |
| rs42039    | 7 | 92082358  | T | C | 0.283 | 0.068     | 0.0034 | 3.80E-88 | CDK6       |
| rs17250196 | 7 | 99655132  | T | G | 0.061 | 0.045     | 0.0072 | 4.20E-10 | GATS/PVRIG |
| rs1550162  | 8 | 117632713 | A | G | 0.725 | -2.40E-02 | 0.0032 | 1.30E-13 | EIF3H      |
| rs1599473  | 8 | 120544539 | T | G | 0.15  | -2.70E-02 | 0.0034 | 1.00E-14 | NOV        |
| rs4733724  | 8 | 130792910 | A | G | 0.808 | 0.05      | 0.0037 | 1.40E-41 | MLZE       |
| rs7834383  | 8 | 13317848  | T | G | 0.397 | 2.20E-02  | 0.0032 | 1.50E-11 | DLC1       |
| rs1036821  | 8 | 135719665 | A | G | 0.317 | -3.70E-02 | 0.0032 | 1.10E-30 | ZFAT       |
| rs2013265  | 8 | 24148445  | T | C | 0.242 | -0.028    | 0.0033 | 2.40E-16 | ADAM28     |
| rs568610   | 8 | 27583914  | T | C | 0.208 | 2.20E-02  | 0.0034 | 1.40E-10 | SCARA3     |
| rs6988484  | 8 | 49576333  | T | C | 0.683 | -0.022    | 0.0033 | 4.80E-11 | EFCAB1     |
| rs9650315  | 8 | 57318152  | T | G | 0.125 | -0.061    | 0.0045 | 1.50E-41 | CHCHD7     |
| rs2956605  | 8 | 76045609  | A | C | 0.383 | 2.40E-02  | 0.0031 | 5.10E-15 | CRISPLD1   |
| rs429433   | 8 | 8785304   | A | G | 0.05  | 0.046     | 0.0071 | 1.30E-10 | MFHAS1     |
| rs989393   | 9 | 100783157 | T | C | 0.7   | 2.20E-02  | 0.0032 | 3.30E-11 | COL15A1    |
| rs7027110  | 9 | 108638867 | A | G | 0.258 | 3.20E-02  | 0.0034 | 2.10E-20 | ZNF462     |
| rs3739707  | 9 | 112832527 | A | C | 0.3   | -2.40E-02 | 0.0035 | 4.00E-12 | LPAR1      |
| rs7033487  | 9 | 118169078 | T | C | 0.775 | 3.70E-02  | 0.0036 | 1.10E-24 | PAPPA      |
| rs7466269  | 9 | 132453905 | A | G | 0.667 | 3.30E-02  | 0.0031 | 1.00E-27 | FUBP3      |
| rs3132297  | 9 | 136441687 | A | G | 0.147 | -2.30E-02 | 0.0042 | 3.80E-08 | RXRA       |
| rs7849585  | 9 | 138251691 | T | G | 0.317 | 3.60E-02  | 0.0032 | 1.10E-29 | QSOX2      |
| rs1576900  | 9 | 18619792  | A | G | 0.28  | -0.019    | 0.0033 | 6.60E-09 | ADAMTSL1   |
| rs11144688 | 9 | 77732106  | A | G | 0.095 | -6.30E-02 | 0.0063 | 5.70E-24 | PCSK5      |
| rs7853235  | 9 | 85850602  | T | C | 0.15  | 0.029     | 0.0037 | 7.50E-15 | RMI1       |
| rs181338   | 9 | 88297981  | T | C | 0.492 | 2.80E-02  | 0.0029 | 2.50E-22 | ZCCHC6     |
| rs7043114  | 9 | 94427804  | T | C | 0.517 | -2.90E-02 | 0.0029 | 1.80E-22 | IPPK       |
| rs817300   | 9 | 97420043  | A | G | 0.035 | -0.085    | 0.0069 | 4.30E-34 | PTCH1      |



Supplementary Table 3c: Summary of the systolic blood pressure SNPs previously identified as associated with systolic blood pressure at genome wide significance

| SNP        | Chr | Position (bp) | A1 | A2 | Frequency | A1           | Beta     | SE       | P             | Nearest Gene |
|------------|-----|---------------|----|----|-----------|--------------|----------|----------|---------------|--------------|
| rs17367504 | 1   | 11785365      | G  | A  | 0.15      | -0.861270375 | 0.135569 | 2.11E-10 | MTHFR-NPPB    |              |
| rs2932538  | 1   | 113018066     | G  | A  | 0.75      | 0.538172767  | 0.114735 | 2.72E-06 | MOV10         |              |
| rs13082711 | 3   | 27512913      | T  | C  | 0.78      | -0.308571186 | 0.118198 | 0.009038 | SLC4A7        |              |
| rs419076   | 3   | 170583580     | T  | C  | 0.47      | 0.519099789  | 0.096703 | 7.96E-08 | MECOM         |              |
| rs13107325 | 4   | 103407732     | T  | C  | 0.05      | -1.07405989  | 0.208449 | 2.57E-07 | SLC39A8       |              |
| rs1458038  | 4   | 81383747      | T  | C  | 0.29      | 0.662369723  | 0.110612 | 2.12E-09 | FGF5          |              |
| rs1173771  | 5   | 32850785      | G  | A  | 0.60      | 0.518884302  | 0.098626 | 1.43E-07 | NPR3-C5orf23  |              |
| rs805303   | 6   | 31724345      | G  | A  | 0.61      | 0.482412818  | 0.099617 | 1.28E-06 | BAT2-BAT5     |              |
| rs11191548 | 10  | 104836168     | T  | C  | 0.91      | 1.082956457  | 0.174159 | 5.03E-10 | CYP17A1-NT5C2 |              |
| rs1813353  | 10  | 18747454      | T  | C  | 0.68      | 0.515202031  | 0.105114 | 9.52E-07 | CACNB2(3')    |              |
| rs932764   | 10  | 95885930      | G  | A  | 0.44      | 0.503919963  | 0.097615 | 2.44E-07 | PLCE1         |              |
| rs381815   | 11  | 16858844      | T  | C  | 0.26      | 0.65466      | 0.109758 | 2.45E-09 | PLEKHA7       |              |
| rs7129220  | 11  | 10307114      | G  | A  | 0.89      | -0.823718311 | 0.155517 | 1.18E-07 | ADM           |              |
| rs17249754 | 12  | 88584717      | G  | A  | 0.84      | 0.955148491  | 0.133881 | 9.73E-13 | ATP2B1        |              |
| rs3184504  | 12  | 110368991     | T  | C  | 0.47      | 0.598422185  | 0.099323 | 1.69E-09 | SH2B3         |              |
| rs1378942  | 15  | 72864420      | C  | A  | 0.35      | 0.631582192  | 0.100605 | 3.43E-10 | CYP1A1-ULK3   |              |
| rs12940887 | 17  | 44757806      | T  | C  | 0.38      | 0.394575927  | 0.100154 | 8.16E-05 | ZNF652        |              |
| rs17608766 | 17  | 42368270      | T  | C  | 0.86      | -0.705233925 | 0.142405 | 7.33E-07 | GOSR2         |              |
| rs1327235  | 20  | 10917030      | G  | A  | 0.46      | 0.358044305  | 0.097107 | 0.000227 | JAG1          |              |
| rs6015450  | 20  | 57184512      | G  | A  | 0.12      | 0.801129685  | 0.150225 | 9.67E-08 | GNAS-EDN3     |              |

Supplementary Table 3d: Summary of the coronary artery disease SNPs previously identified as associated with coronary artery disease at genome wide significance

| SNP        | Chr | Position (bp) | A1 | A2 | Frequency | A1   | OR   | CI95_low | CI95_up                  | Nearest gene |
|------------|-----|---------------|----|----|-----------|------|------|----------|--------------------------|--------------|
| rs1122608  | 19  | 11163601      | G  | T  | 0.77      | 1.14 | 1.09 | 1.18     | LDLR                     |              |
| rs11556924 | 7   | 129663496     | C  | T  | 0.62      | 1.09 | 1.07 | 1.12     | ZC3HC1                   |              |
| rs12413409 | 10  | 104719096     | G  | A  | 0.89      | 1.12 | 1.08 | 1.16     | CYP17A1, CNNM2, NT5C2    |              |
| rs12936587 | 17  | 17543722      | G  | A  | 0.56      | 1.07 | 1.05 | 1.09     | RASD1, SMCR3, PEMT       |              |
| rs17114036 | 1   | 56962821      | A  | G  | 0.91      | 1.17 | 1.13 | 1.22     | PPAP2B                   |              |
| rs1746048  | 10  | 44775824      | C  | T  | 0.87      | 1.09 | 1.07 | 1.13     | CXCL12                   |              |
| rs17465637 | 1   | 222823529     | C  | A  | 0.74      | 1.14 | 1.09 | 1.2      | MIA3                     |              |
| rs2306374  | 3   | 138119952     | C  | T  | 0.18      | 1.12 | 1.07 | 1.16     | MRAS                     |              |
| rs2895811  | 14  | 100133942     | C  | T  | 0.43      | 1.07 | 1.05 | 1.1      | HHIPL1                   |              |
| rs3798220  | 6   | 160961137     | C  | T  | 0.02      | 1.51 | 1.33 | 1.7      | LPA                      |              |
| rs3825807  | 15  | 79089111      | A  | G  | 0.57      | 1.08 | 1.06 | 1.1      | ADAMTS7                  |              |
| rs46522    | 17  | 46988597      | T  | C  | 0.53      | 1.06 | 1.04 | 1.08     | UBE2Z, GIP, ATP5G1, SNF8 |              |
| rs4773144  | 13  | 110960712     | G  | A  | 0.44      | 1.07 | 1.05 | 1.09     | COL4A1, COL4A2           |              |
| rs4977574  | 9   | 22098574      | G  | A  | 0.46      | 1.29 | 1.23 | 1.36     | CDKN2A                   |              |
| rs579459   | 9   | 136154168     | C  | T  | 0.21      | 1.1  | 1.07 | 1.13     | ABO                      |              |
| rs599839   | 1   | 109822166     | A  | G  | 0.78      | 1.11 | 1.08 | 1.15     | SORT1                    |              |
| rs6725887  | 2   | 203745885     | C  | T  | 0.15      | 1.14 | 1.09 | 1.19     | WDR12                    |              |
| rs9982601  | 21  | 35599128      | T  | C  | 0.15      | 1.18 | 1.12 | 1.24     | MRPS6                    |              |

Supplementary Table 3e: Summary of the type 2 diabetes SNPs previously identified as associated with type 2 diabetes at genome wide significance

| SNP        | Chr | Position (bp) | A1 | A2 | Frequency A1 | OR   | CI95_low | CI95_up | Nearest gene |
|------------|-----|---------------|----|----|--------------|------|----------|---------|--------------|
| rs4402960  | 3   | 186994381     | T  | G  | [0.27-0.33]  | 1.13 | 1.09     | 1.17    | IGF2BP2      |
| rs7756992  | 6   | 20787688      | G  | A  | [0.23-0.34]  | 1.2  | 1.16     | 1.25    | CDKAL1       |
| rs849135   | 7   | 28162938      | G  | A  | [0.50-0.53]  | 1.12 | 1.08     | 1.17    | JAZF1        |
| rs3802177  | 8   | 118254206     | G  | A  | [0.60-0.91]  | 1.16 | 1.11     | 1.22    | SLC30A8      |
| rs10811661 | 9   | 22124094      | T  | C  | [0.81-0.84]  | 1.18 | 1.13     | 1.24    | CDKN2A/B     |
| rs1111875  | 10  | 94452862      | C  | T  | [0.53-0.63]  | 1.15 | 1.11     | 1.19    | HHEX/IDE     |
| rs7903146  | 10  | 114748339     | T  | C  | [0.18-0.38]  | 1.4  | 1.35     | 1.46    | TCF7L2       |
| rs9936385  | 16  | 52376670      | C  | T  | [0.36-0.41]  | 1.13 | 1.09     | 1.18    | FTO          |

Supplementary Table 3f: Summary of the educational attainment SNPs previously identified as associated with educational attainment at genome wide significance

| SNP         | Chr | Position (bp) | A1 | A2 | Frequency | Beta   | SE    | P        | Nearest Gene |
|-------------|-----|---------------|----|----|-----------|--------|-------|----------|--------------|
| rs13402908  | 2   | 100333377     | T  | C  | 0.5056    | -0.018 | 0.003 | 1.70E-11 | AFF3         |
| rs4851251   | 2   | 100753490     | T  | C  | 0.2537    | -0.017 | 0.003 | 1.91E-08 | AFF3         |
| rs1402025   | 5   | 113987898     | T  | C  | 0.7481    | 0.017  | 0.003 | 3.42E-08 | AK097686     |
| rs17824247  | 2   | 144152539     | T  | C  | 0.5802    | -0.016 | 0.003 | 2.77E-09 | ARHGAP15     |
| rs3101246   | 4   | 42649935      | T  | G  | 0.5821    | -0.015 | 0.003 | 1.43E-08 | ATP8A1       |
| rs2837992   | 21  | 42620520      | T  | C  | 0.3881    | 0.015  | 0.003 | 3.80E-08 | BACE2        |
| rs2457660   | 2   | 60757419      | T  | C  | 0.6063    | -0.017 | 0.003 | 7.11E-10 | BCL11A       |
| rs11191193  | 10  | 103802408     | A  | G  | 0.6511    | 0.018  | 0.003 | 5.44E-11 | C10orf76     |
| rs62263923  | 3   | 85674790      | A  | G  | 0.6437    | -0.016 | 0.003 | 7.01E-09 | CADM2        |
| rs113520408 | 7   | 128402782     | A  | G  | 0.2668    | 0.017  | 0.003 | 1.97E-08 | CALU         |
| rs35761247  | 3   | 48623124      | A  | G  | 0.05597   | 0.034  | 0.006 | 3.82E-08 | COL7A1       |
| rs17167170  | 7   | 133302345     | A  | G  | 0.7873    | 0.02   | 0.003 | 1.14E-09 | EXOC4        |
| rs12772375  | 10  | 104082688     | T  | G  | 0.416     | -0.015 | 0.003 | 1.56E-08 | GBF1         |
| rs2615691   | 7   | 23402104      | A  | G  | 0.02799   | -0.037 | 0.007 | 4.71E-08 | IGF2BP3      |
| rs2456973   | 12  | 56416928      | A  | C  | 0.6791    | -0.02  | 0.003 | 1.06E-12 | IKZF4        |
| rs10061788  | 5   | 87934707      | A  | G  | 0.2164    | 0.021  | 0.004 | 2.46E-09 | LINC00461    |
| rs324886    | 5   | 87896602      | T  | C  | 0.3601    | -0.015 | 0.003 | 1.91E-08 | LINC00461    |
| rs4863692   | 4   | 140764124     | T  | G  | 0.334     | 0.018  | 0.003 | 1.56E-10 | MAML3        |
| rs11588857  | 1   | 204587047     | A  | G  | 0.209     | 0.02   | 0.003 | 5.27E-10 | MDM4         |
| rs12646808  | 4   | 3249828       | T  | C  | 0.6418    | 0.016  | 0.003 | 4.00E-08 | MSANTD1      |
| rs165633    | 22  | 29880773      | A  | G  | 0.7948    | -0.018 | 0.003 | 2.86E-09 | NEFH         |
| rs34305371  | 1   | 72733610      | A  | G  | 0.08769   | 0.035  | 0.005 | 3.76E-14 | NEGR1        |
| rs76076331  | 2   | 10977585      | T  | C  | 0.09328   | 0.02   | 0.004 | 3.63E-08 | PDIA6        |
| rs12531458  | 7   | 39090698      | A  | C  | 0.5354    | 0.014  | 0.003 | 3.11E-08 | POU6F2       |
| rs1043209   | 14  | 23373986      | A  | G  | 0.6026    | 0.018  | 0.003 | 1.82E-11 | RBM23        |
| rs112634398 | 3   | 50075494      | A  | G  | 0.95896   | 0.036  | 0.007 | 4.61E-08 | RBM6         |
| rs301800    | 1   | 8490603       | T  | C  | 0.1791    | 0.019  | 0.003 | 1.79E-08 | RERE         |
| rs7767938   | 6   | 153367613     | T  | C  | 0.7705    | 0.017  | 0.003 | 2.44E-08 | RGS17        |
| rs148734725 | 3   | 49406708      | A  | G  | 0.3078    | 0.025  | 0.003 | 1.36E-18 | RHOA         |
| rs4500960   | 2   | 162818621     | T  | C  | 0.4776    | -0.016 | 0.003 | 3.75E-10 | SLC4A10      |
| rs572016    | 12  | 121279083     | A  | G  | 0.4907    | 0.014  | 0.003 | 3.46E-08 | SPPL3        |
| rs7945718   | 11  | 12748819      | A  | G  | 0.5951    | 0.015  | 0.003 | 1.54E-08 | TEAD1        |
| rs7854982   | 9   | 124644562     | T  | C  | 0.4869    | -0.015 | 0.003 | 1.29E-08 | TLL1         |
| rs10496091  | 2   | 61482261      | A  | G  | 0.2705    | -0.018 | 0.003 | 5.62E-10 | USP34        |
| rs12987662  | 2   | 100821548     | A  | C  | 0.3787    | 0.027  | 0.003 | 2.69E-24 | AFF3         |
| rs9320913   | 6   | 98584733      | A  | C  | 0.5019    | 0.024  | 0.003 | 2.46E-19 | AK091365     |
| rs11712056  | 3   | 49914397      | T  | C  | 0.5504    | 0.024  | 0.003 | 3.30E-19 | CAMKV        |
| rs13294439  | 9   | 23358875      | A  | C  | 0.5765    | -0.023 | 0.003 | 2.20E-17 | CR627240     |
| rs9537821   | 13  | 58402771      | A  | G  | 0.7631    | 0.024  | 0.003 | 1.50E-16 | PCDH17       |
| rs11210860  | 1   | 43982527      | A  | G  | 0.3694    | 0.017  | 0.003 | 2.36E-10 | PTPRF        |
| rs17119973  | 14  | 84913111      | A  | G  | 0.3078    | -0.019 | 0.003 | 3.55E-10 | FLRT2        |
| rs1871109   | 9   | 1746016       | T  | G  | 0.5616    | -0.016 | 0.003 | 4.35E-10 | SMARCA2      |
| rs1008078   | 1   | 91189731      | T  | C  | 0.3731    | -0.016 | 0.003 | 6.01E-10 | BARHL2       |
| rs12671937  | 7   | 92654365      | A  | G  | 0.5634    | 0.016  | 0.003 | 9.15E-10 | SAMD9        |
| rs11768238  | 7   | 135227513     | A  | G  | 0.3246    | -0.017 | 0.003 | 9.90E-10 | NUP205       |
| rs56231335  | 6   | 98187291      | T  | C  | 0.6474    | -0.017 | 0.003 | 2.07E-09 | AK091365     |
| rs62259535  | 3   | 48939052      | A  | G  | 0.97015   | 0.048  | 0.008 | 2.63E-09 | SLC25A20     |
| rs16845580  | 2   | 161920884     | T  | C  | 0.6306    | 0.016  | 0.003 | 2.65E-09 | TANK         |
| rs2245901   | 2   | 194296294     | A  | G  | 0.4216    | -0.016 | 0.003 | 4.54E-09 | PCGEM1       |
| rs2431108   | 5   | 103947968     | T  | C  | 0.6325    | 0.016  | 0.003 | 5.27E-09 | NUDT12       |
| rs12969294  | 18  | 35186122      | A  | G  | 0.3787    | -0.016 | 0.003 | 7.24E-09 | CELF4        |
| rs1777827   | 1   | 211613114     | A  | G  | 0.569     | 0.015  | 0.003 | 1.55E-08 | LINC00467    |
| rs2568955   | 1   | 72762169      | T  | C  | 0.2369    | -0.017 | 0.003 | 1.80E-08 | NEGR1        |
| rs11690172  | 2   | 57387094      | A  | G  | 0.6119    | 0.015  | 0.003 | 1.99E-08 | VRK2         |
| rs2610986   | 4   | 18037231      | T  | C  | 0.6511    | -0.016 | 0.003 | 2.01E-08 | LCORL        |
| rs895606    | 9   | 88003668      | A  | G  | 0.4328    | 0.015  | 0.003 | 2.25E-08 | AGTPBP1      |
| rs114598875 | 2   | 60976384      | A  | G  | 0.8246    | -0.02  | 0.004 | 2.41E-08 | PAPOLG       |
| rs1606974   | 2   | 51873599      | A  | G  | 0.1101    | 0.022  | 0.004 | 2.80E-08 | NRXN1        |
| rs2964197   | 5   | 57535206      | T  | C  | 0.5019    | 0.015  | 0.003 | 3.02E-08 | PLK2         |
| rs62379838  | 5   | 120102028     | T  | C  | 0.681     | 0.016  | 0.003 | 3.30E-08 | PRR16        |
| rs34072092  | 4   | 28801221      | T  | C  | 0.8694    | 0.024  | 0.004 | 3.91E-08 | STIM2        |
| rs6739979   | 2   | 193731929     | T  | C  | 0.597     | -0.015 | 0.003 | 4.70E-08 | PCGEM1       |
